# Supplementary material
Source: MDPI journal article supplement (https://www.mdpi.com/2073-4441/13/21/3086)
Supplement: s1 [file s1 › water-1396939-supplementary.pdf]

## Supplementary Information

# Probability of non-exceedance of arsenic concentration in groundwater estimated using stochastic multicomponent reactive transport modeling

Nico Dalla Libera<sup>1</sup>, Daniele Pedretti<sup>2\*</sup>, Giulia Casiraghi<sup>2</sup>, Ábel Markó<sup>3</sup>, Leonardo Piccinini<sup>4</sup> and Paolo Fabbri<sup>4</sup>

<sup>1</sup> Autorità di bacino distrettuale delle Alpi orientali, Cannaregio 4314, 30121 Venice, Italy ([nico.dallalibera@distrettoalpiorientali.it](mailto:nico.dallalibera@distrettoalpiorientali.it))

<sup>2</sup> Dipartimento di Scienze della Terra “A. Desio”, Università degli Studi di Milano (UNIMI), Via Mangiagalli 34, 20133 Milan, Italy ([daniele.pedretti@unimi.it](mailto:daniele.pedretti@unimi.it); [giulia.casiraghi@unimi.it](mailto:giulia.casiraghi@unimi.it))

<sup>3</sup> József and Erzsébet Tóth Endowed Hydrogeology Chair, Eötvös Loránd University, Budapest, Hungary ([marab@student.elte.hu](mailto:marab@student.elte.hu))

<sup>4</sup> Department of Geosciences, Università degli Studi di Padova, Via Gradenigo 6, 35131 Padova, Italy ([paolo.fabbri@unipd.it](mailto:paolo.fabbri@unipd.it); [leonardo.piccinini@unipd.it](mailto:leonardo.piccinini@unipd.it))

\* Correspondence: [daniele.pedretti@unimi.it](mailto:daniele.pedretti@unimi.it)

## Contents

|       |                                                 |    |
|-------|-------------------------------------------------|----|
| SI-1. | Datasets, sampling and analyses specifics ..... | 2  |
| SI-2. | Stratigraphic dataset and transiograms .....    | 4  |
| SI-3. | Flow model calibration .....                    | 7  |
| SI-4. | Variograms computed on the 2009 dataset.....    | 10 |

## SI-1. Datasets, sampling and analyses specifics

The pH, Eh, electric conductivity, temperature and dissolved oxygen were measured by a multiparametric probe (YSI 556 MPS). The ORP was estimated with a platinum electrode and successive automatically corrected to Eh with reference to the standard hydrogen electrode. The Eh values were later converted in pE for geochemical calculations. A flow-through cell was used to measured Eh, to minimize the groundwater exposure to the atmosphere. The chemical parameters were estimated in a laboratory through different standardized methods. Arsenic and manganese were estimated by the UNI EN ISO 17294-2:2005 method, iron was estimated by the APAT CNR IRSA 3160 Man 29 2003 method, ammonium was estimated by the APAT CNR IRSA 4030 A1 Man 29 2003 method, and total organic carbon (TOC) was estimated through the APHA 5310-B 2005 method.

**Table S1.** Available dataset from the 2009 geochemical survey. X,Y= UTM geographical position (32N); T=temperature; EC = electrical conductivity ( $\mu\text{S}/\text{cm}$ ); ORP =oxidizing-reducing potential; Turb=turbidity. Concentrations as  $\mu\text{g}/\text{L}^{-1}$ .

| Nome   | X       | Y       | pH   | T     | EC   | Turb  | O <sub>2(aq)</sub> | As  | Fe   | Mn   | B   | F   |
|--------|---------|---------|------|-------|------|-------|--------------------|-----|------|------|-----|-----|
| PZP032 | 2300283 | 5037034 | 6.84 | 16.27 | 766  | 0.7   | 7.4                | 8   | 2036 | 419  | 86  | 202 |
| PZP033 | 2300350 | 5036929 | 6.93 | 17.1  | 604  | 1000  | 24                 | 15  | 1752 | 1079 | 110 | 514 |
| PZP034 | 2300601 | 5037113 | 6.17 | 14.48 | 741  | 0.69  | 13.1               | 6   | 1451 | 303  | 60  | 516 |
| PZP035 | 2300475 | 5036856 | 6.6  | 15.83 | 554  | 55    | 9.1                | 24  | 1654 | 177  | 34  | 228 |
| PZP036 | 2300973 | 5036996 | 6.86 | 15.11 | 826  | 18    | 14                 | 1   | 205  | 611  | 98  | 308 |
| PZP037 | 2300961 | 5038217 | 7.1  | 15.5  | 970  | 1000  | 12.9               | 64  | 3347 | 263  | 118 | 350 |
| PZP038 | 2300748 | 5038010 | 6.86 | 17.5  | 2044 | 2.61  | 7.2                | 7   | 1357 | 380  | 77  | 300 |
| PZP040 | 2301094 | 5037814 | 7.03 | 17.92 | 1134 | 1000  | 9.1                | 14  | 913  | 348  | 18  | 230 |
| PZP041 | 2301010 | 5036123 | 7.93 | 14.28 | 643  | 295   | 10.4               | 8   | 46   | 216  | 40  | 498 |
| PZP043 | 2301481 | 5036427 | 7.76 | 15.02 | 711  | 72    | 8.1                | 26  | 1563 | 187  | 86  | 351 |
| PZP045 | 2299883 | 5037414 | 6.93 | 15.12 | 1017 | 21    | 8                  | 1   | 1214 | 582  | 396 | 146 |
| PZP046 | 2300076 | 5036916 | 8.63 | 13.66 | 660  | 286   | 9.8                | 17  | 1682 | 288  | 92  | 315 |
| PZP047 | 2300700 | 5037662 | 6.96 | 18.17 | 1141 | 95    | 13.4               | 46  | 1300 | 804  | 107 | 280 |
| PZP048 | 2300676 | 5037289 | 6.49 | 15.43 | 1100 | 498   | 9.8                | 9   | 4462 | 419  | 113 | 205 |
| PZP049 | 2301021 | 5038583 | 7.09 | 17.08 | 786  | 24.58 | 8.1                | 20  | 819  | 302  | 24  | 230 |
| PZP050 | 2301127 | 5038092 | 7.03 | 16.15 | 740  | 14.73 | 9.5                | 55  | 1439 | 82   | 41  | 350 |
| PZP051 | 2301045 | 5037179 | 7.09 | 16.7  | 782  | 12    | 14.9               | 1   | 690  | 161  | 89  | 222 |
| PZP052 | 2300955 | 5036921 | 6.76 | 17.12 | 907  | 1000  | 10.8               | 11  | 1135 | 411  | 62  | 280 |
| PZP053 | 2300865 | 5036277 | 8.69 | 13.86 | 492  | 6.54  | 7.3                | 174 | 1304 | 398  | 27  | 400 |
| PZP054 | 2301328 | 5037011 | 6.9  | 15.18 | 1065 | 1000  | 10.7               | 32  | 1660 | 406  | 932 | 235 |
| PZP055 | 2301366 | 5036100 | 9.06 | 14.17 | 814  | 71    | 9.7                | 142 | 4700 | 98   | 118 | 335 |
| PZP056 | 2301656 | 5037711 | 6.76 | 20.66 | 1277 | 1000  | 13.3               | 15  | 1334 | 765  | 144 | 260 |
| PZP057 | 2301696 | 5037214 | 8.83 | 12.16 | 706  | 457   | 32.8               | 2   | 10   | 2.5  | 65  | 728 |
| PZP058 | 2301144 | 5035770 | 8.47 | 13.41 | 972  | 52    | 10.9               | 142 | 1508 | 148  | 131 | 372 |
| PZP060 | 2301685 | 5038115 | 8.32 | 12.98 | 593  | 1000  | 36.8               | 1   | 208  | 71   | 26  | 586 |
| PZP061 | 2301821 | 5037961 | 8.34 | 15.02 | 2149 | 1000  | 7.4                | 14  | 367  | 425  | 261 | 779 |
| PZP062 | 2300313 | 5037097 | 7.04 | 14.41 | 822  | 55    | 18.3               | 28  | 1865 | 235  | 63  | 218 |
| PZP063 | 2300763 | 5037255 | 6.68 | 15.33 | 1326 | 75    | 7.7                | 4   | 1199 | 582  | 78  | 299 |
| PZP064 | 2300975 | 5037164 | 8.83 | 14.09 | 955  | 0     | 28.5               | 3   | 64   | 96   | 85  | 366 |
| PZR035 | 2300478 | 5036855 | 6.61 | 16.59 | 740  | 374   | 16.9               | 7   | 645  | 885  | 42  | 230 |
| PZR037 | 2300962 | 5038216 | 6.93 | 17.71 | 879  | 1000  | 14.3               | 29  | 1905 | 331  | 53  | 303 |

Supplementary Information – Dalla Libera et al. (2021) *Water*

|         |         |         |      |       |      |       |      |    |       |     |     |     |
|---------|---------|---------|------|-------|------|-------|------|----|-------|-----|-----|-----|
| PZR038  | 2300748 | 5038013 | 6.87 | 20.65 | 1261 | 25.01 | 16.6 | 2  | 33    | 214 | 132 | 200 |
| PZS_038 | 2300748 | 5038015 | 7.04 | 17.58 | 1067 | 166   | 8.6  | 10 | 0.765 | 602 | 72  | 200 |
| PZS_040 | 2301091 | 5037815 | 6.96 | 17.75 | 1392 | 1000  | 8.1  | 21 | 1.38  | 394 | 52  | 230 |

**Table S2.** Available dataset from the 2017 geochemical survey. T=temperature; EC = electrical conductivity ( $\mu\text{S}/\text{cm}$ ); ORP =oxidizing-reducing potential; TOC = total organic carbon

| ID     | T    | pH   | Eh     | EC                      | HCO <sub>3</sub> | NH <sub>4</sub> | PO <sub>4</sub> | SO <sub>4</sub> | F    | Cl   |
|--------|------|------|--------|-------------------------|------------------|-----------------|-----------------|-----------------|------|------|
| units  | °C   | pH   | mV     | $\mu\text{S}/\text{cm}$ | mg/L             | mg/l            | mg/l            | mg/l            | mg/l | mg/l |
| PZP036 | 14.2 | 7.16 | -161   | 855                     | 539              | 0.91            | 0.1             | 71              | 0.16 | 21   |
| PZP038 | 14.3 | 6.9  | -48.3  | 904                     | 636              | 2.3             | 0.03            | 1               | 0.1  | 26   |
| PZP040 | 17   | 7.07 | -110.4 | 886                     | 530              | 0.15            | 0.03            | 31              | 0.27 | 34   |
| PZP041 | 14.3 | 7.02 | -141.2 | 881                     | 539              | 3.67            | 0.14            | 12              | 0.13 | 45   |
| PZP043 | 15.1 | 7.1  | -100.3 | 737                     | 477              | 3.44            | 0.12            | 1               | 0.19 | 33   |
| PZP053 | 13.9 | 7.27 | -137.2 | 611                     | 438              | 3.5             | 0.03            | 1               | 0.25 | 15   |
| PZP061 | 15.8 | 6.78 | -78.9  | 2432                    | 688              | 0.12            | 0.05            | 1               | 1.5  | 135  |
| PZP064 | 16.2 | 7.18 | -151.3 | 894                     | 498              | 0.79            | 0.34            | 56              | 0.19 | 48   |

| ID     | Na    | K    | Mg   | Ca    | Si    | S    | TOC  | As                     | B                      | Fe                     | Mn                     |
|--------|-------|------|------|-------|-------|------|------|------------------------|------------------------|------------------------|------------------------|
| units  | mg/l  | mg/l | mg/l | mg/l  | mg/l  | mg/l | mg/l | $\mu\text{g}/\text{l}$ | $\mu\text{g}/\text{l}$ | $\mu\text{g}/\text{l}$ | $\mu\text{g}/\text{l}$ |
| PZP036 | 26.5  | 2.1  | 31.6 | 135.6 | 5.15  | 0.05 | 3    | 3                      | 78                     | 1257                   | 162                    |
| PZP038 | 28.2  | 2.5  | 42.2 | 129.2 | 9     | 0.05 | 2.9  | 11                     | 28                     | 3222                   | 159                    |
| PZP040 | 18.9  | 0.8  | 45.1 | 119.7 | 7.45  | 0.05 | 1.5  | 17                     | 14                     | 1464                   | 168                    |
| PZP041 | 33.9  | 2.4  | 34.1 | 118.6 | 10.5  | 0.05 | 3.4  | 16                     | 77                     | 2245                   | 195                    |
| PZP043 | 30.2  | 2.4  | 31.2 | 92.4  | 8.8   | 0.05 | 3.7  | 29                     | 48                     | 1391                   | 119                    |
| PZP053 | 9.8   | 7.5  | 23.7 | 91.4  | 10.82 | 0.05 | 2    | 126                    | 21                     | 1441                   | 153                    |
| PZP061 | 151.6 | 2.7  | 137  | 294   | 8.5   | 0.05 | 5    | 8                      | 251                    | 1240                   | 696                    |
| PZP064 | 35.8  | 7.2  | 29   | 128.6 | 5.03  | 0.05 | 2.6  | 14                     | 65                     | 2779                   | 370                    |

## SI-2. Stratigraphic dataset and transiograms

The subsurface lithological model was generated using the stratigraphic logs from the publicly available borehole database managed by the Veneto Region ([http://gisgeologia.regione.veneto.it/website/dati\\_sond/viewer.htm](http://gisgeologia.regione.veneto.it/website/dati_sond/viewer.htm)). Some 119 boreholes within the WAA were accounted for during the spMC analysis. Their spatial distribution is shown in Figure S1a. Two cross-sections A-A' and B-B' are shown respectively in Figure S1b and S1c; the sections are respectively parallel of the x and y directions.

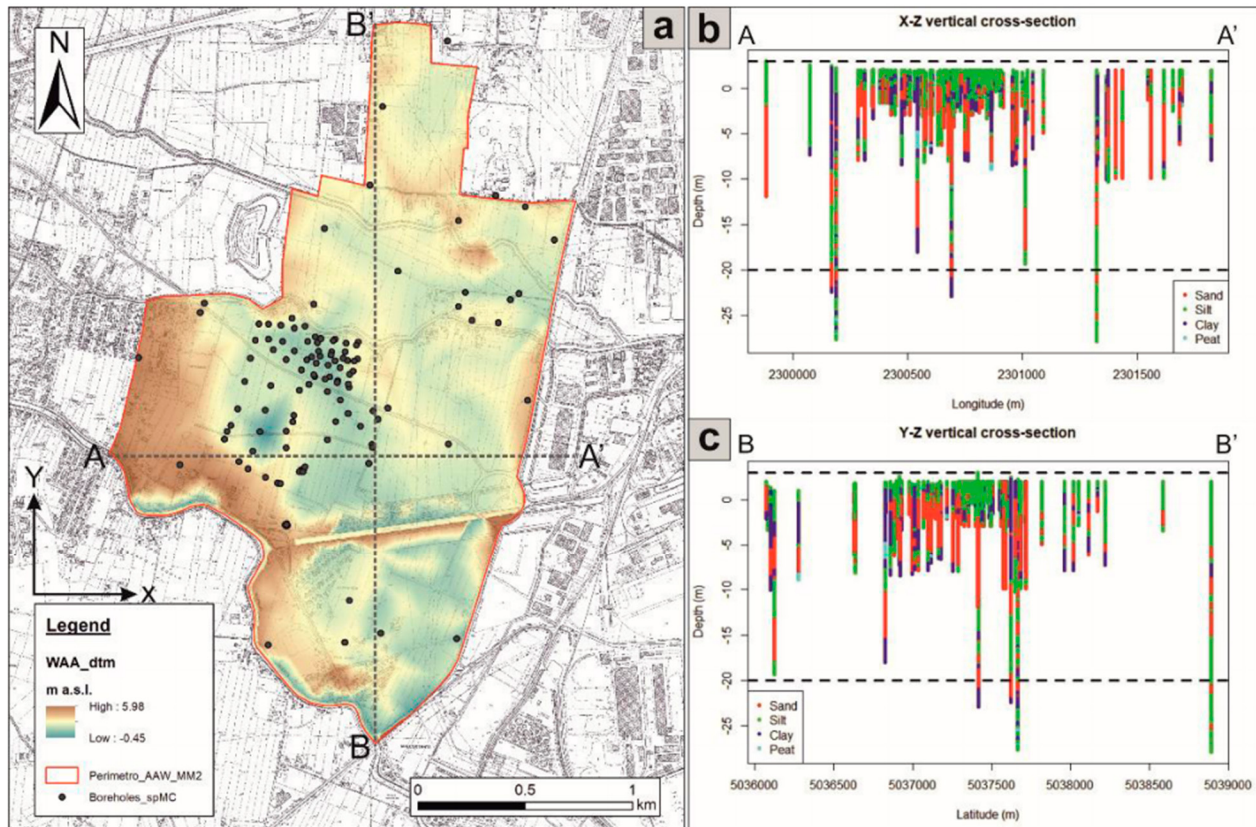

**Figure S1.** (a) Spatial distribution of boreholes used for subsurface heterogeneity modeling of WAA. (b) and (c) show two cross-sections along X and Y direction respectively with a depth (z) discretization of 0.1 m.

The stratigraphic logs reached a maximum depth of 20 meter below the ground level, which comprises the 12-m-thick sediments modelled in this work. The boreholes data were reclassified in-house into four material classes: “Sand”, “Silt”, “Clay”, “Peat”. They were then discretized along the vertical (z) direction with a discretization of  $\Delta z = 0.1\text{m}$ . The classification and discretization process were developed through a C++ script that recognizes the materials along the depth direction and reassigns them to the new discretized depth information.

**Table S3** summarizes the embedded transitional probabilities (TPs) computed by spMC for each material along the three Cartesian direction (x, y, z). The associated transiogram map is depicted in **Figure S2**, while Figure S3 reports the transiograms along the depth direction. The results suggest that there is a clear transition or trend of “silt” and “clay” materials along the x and y directions (higher TPs), as emphasized by This result agrees well with the depositional trend of a flood plain environment. On the contrary, the TPs associated to the “peat” material suggest a more limited and erratic occurrence of this material in the WAA. Along the vertical direction, the “sand” and “silt” materials have a wider transition lag than the other materials. “Peat” material, instead, have small transition lags repeated along the depth, as revealed by the oscillation of experimental

transiogram. This means that “peat” materials may be located in thin layers stack on top of each other and randomly distributed in the aquifer.

**Table S3.** Embedded transitional probabilities along x, y and z direction.

| TP along x | Sand | Silt | Clay | Peat |
|------------|------|------|------|------|
| Sand       |      | 0.72 | 0.28 | 0.00 |
| Silt       | 0.55 |      | 0.42 | 0.03 |
| Clay       | 0.46 | 0.54 |      | 0.00 |
| Peat       | 0.00 | 0.76 | 0.24 |      |

| TP along y | Sand | Silt | Clay | Peat |
|------------|------|------|------|------|
| Sand       |      | 0.67 | 0.32 | 0.01 |
| Silt       | 0.58 |      | 0.41 | 0.01 |
| Clay       | 0.32 | 0.54 |      | 0.06 |
| Peat       | 0.61 | 0.76 | 0.09 |      |

| TP along z | Sand | Silt | Clay | Peat |
|------------|------|------|------|------|
| Sand       |      | 0.63 | 0.35 | 0.02 |
| Silt       | 0.49 |      | 0.50 | 0.01 |
| Clay       | 0.22 | 0.74 |      | 0.04 |
| Peat       | 0.00 | 0.71 | 0.29 |      |

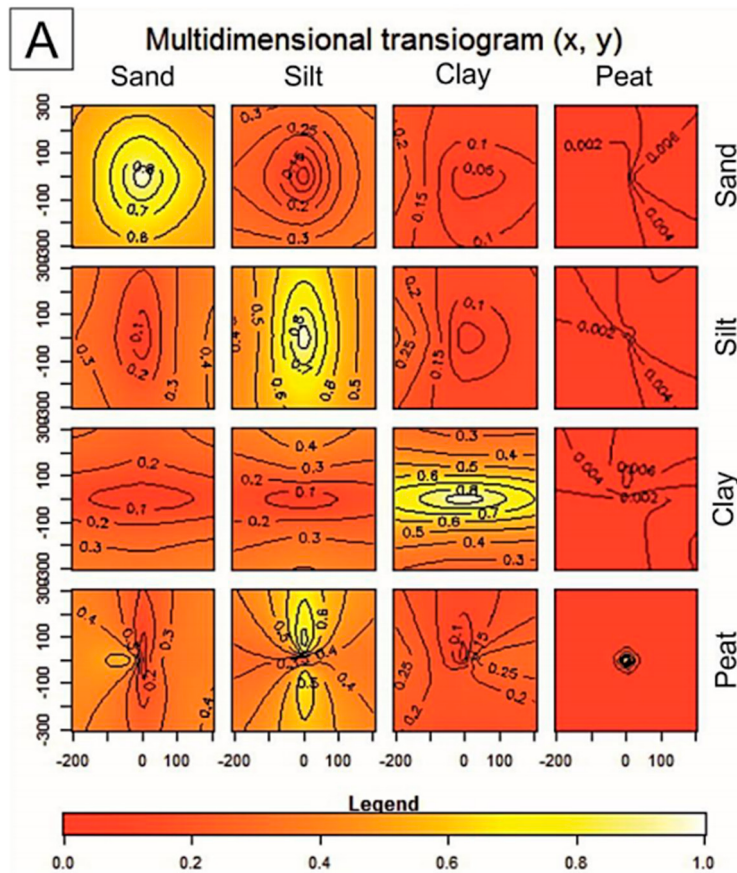

**Figure S2.** Multidimensional transiograms along x and y direction. The color ramp describes the magnitude of the transitional probability [0,1].

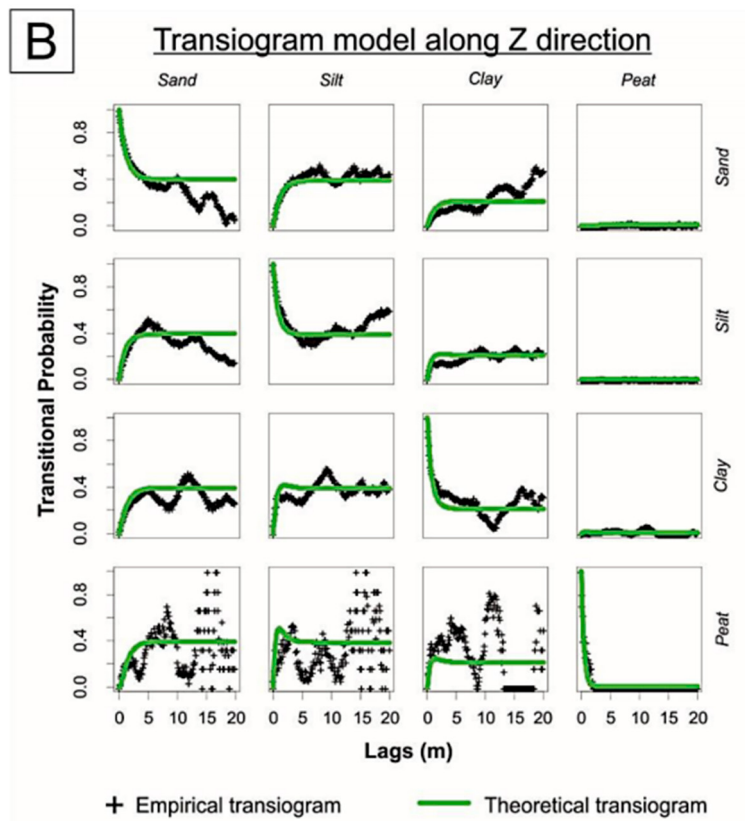

Figure S3 Transiogram along the z direction, illustrating the vertical stratification of the four analyzed materials.

### SI-3. Flow model calibration

For each material, initial sets of  $K$ ,  $S_s$  and  $S_y$  were obtained from slug tests performed in a few boreholes in the WAA. An example of slug test and its interpretation to estimate hydraulic parameters is shown in Figure S4.

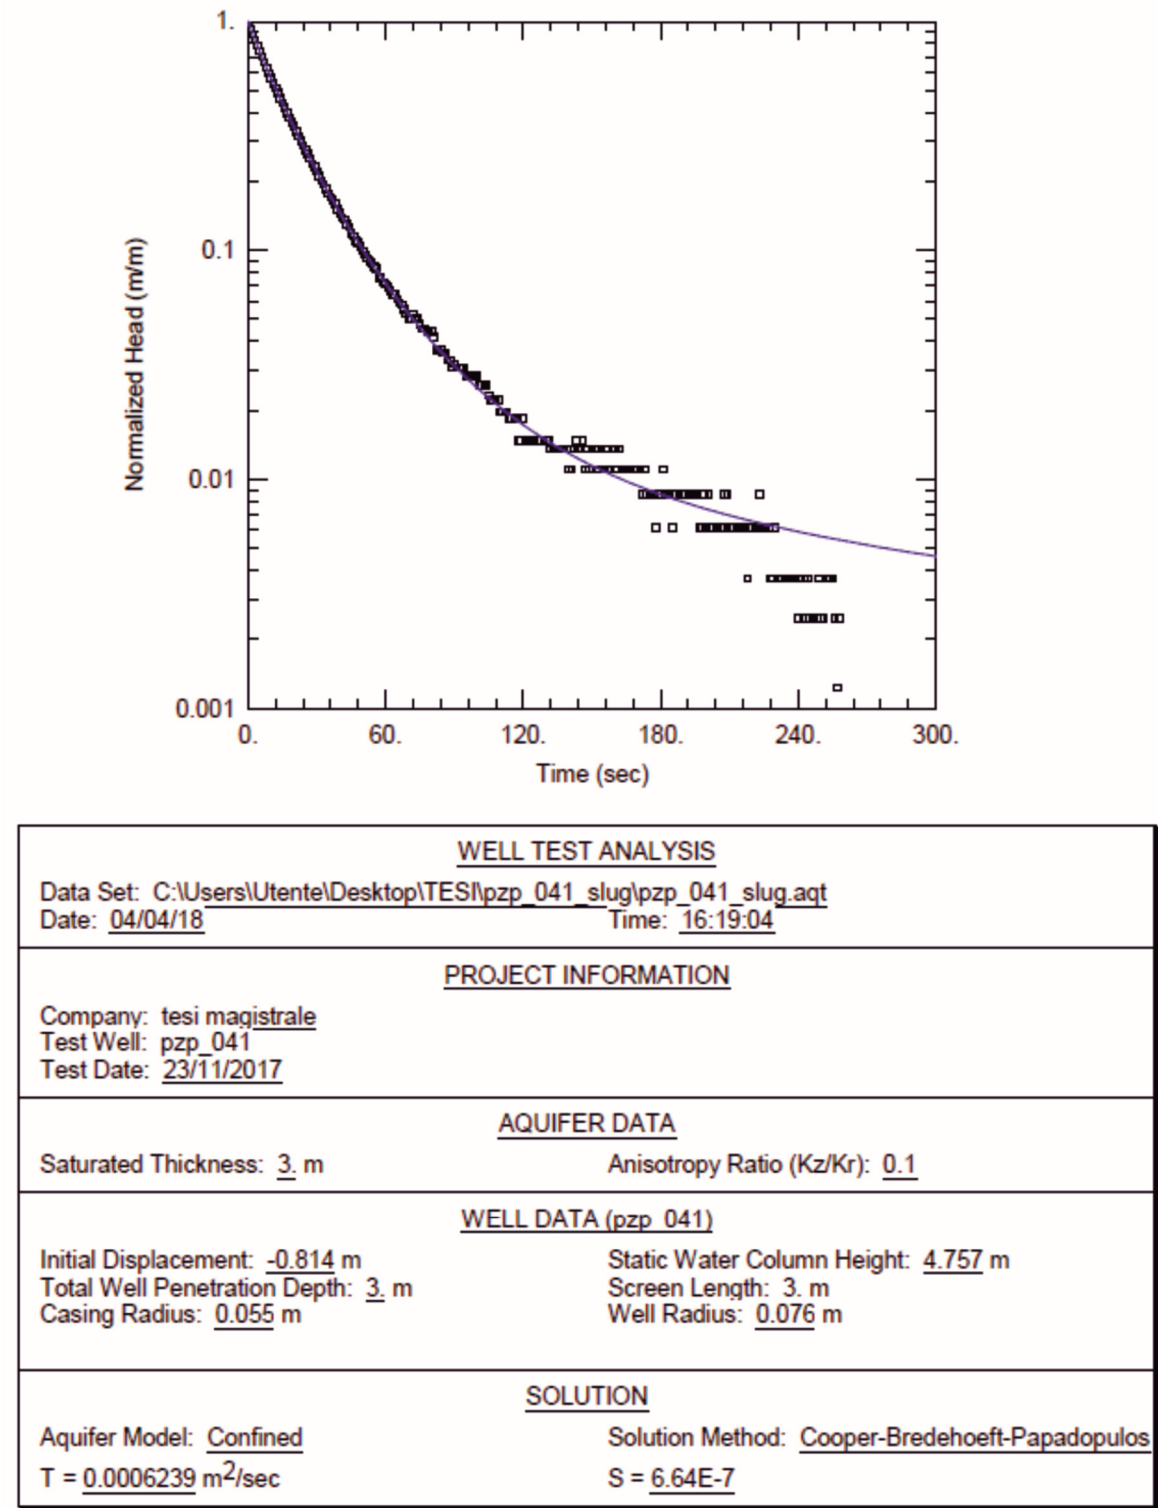

Figure S4 Example of slug test: on top, the observed head levels and the best fitted model; below, the resulting statistics.

Since PHAST is not directly coupled to an automatic calibration algorithm, the flow model was first calibrated through a manual “trial-and-error” approach. Then, an independent automatic calibration was performed using the codes MODFLOW-2005 (Harbaugh, 2005) and PEST (Doherty *et al.*, 1994), providing similar results as the manual calibration (results not reported). Calibrated parameters were  $K$ ,  $S_s$  and  $S_y$  and the transient recharge rate of the RCH boundary conditions. Porosity was set to  $\phi=0.25$ , a typical value for sandy aquifers, and not calibrated. A first-cut estimate of the recharge rate was obtained considering a fraction of the daily rainfall depths recorded in the closest weather station and located in the city of Mira (about 7 km far from the center of the modelled area) (Figure S5). The dataset was provided by Environmental protection Agency of Veneto Region (ARPAV).

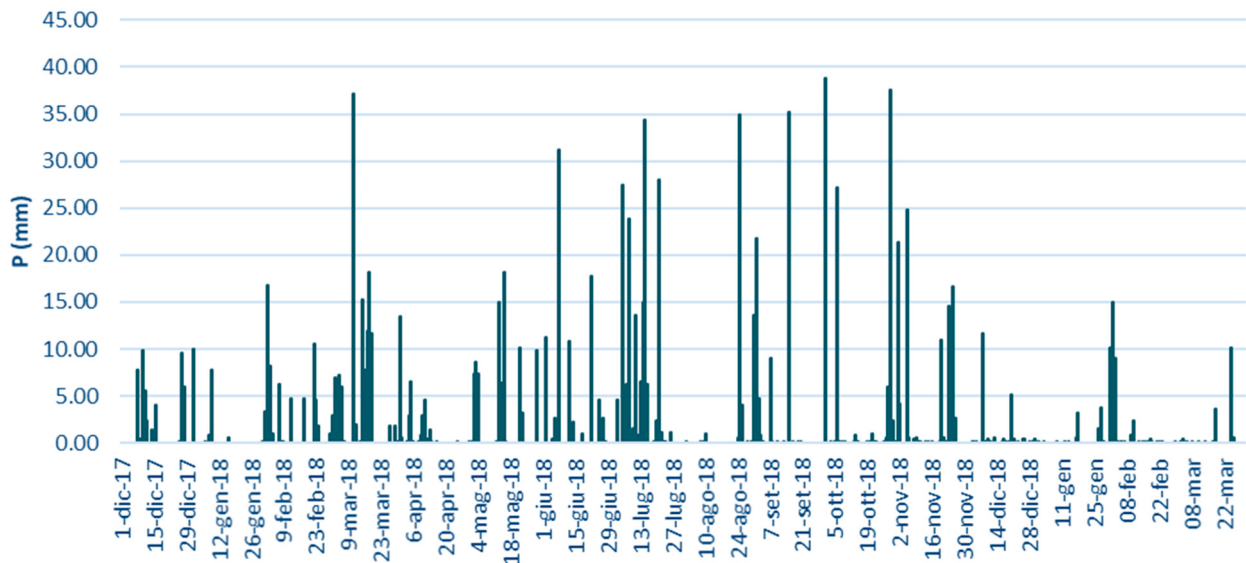

Figure S5 Daily rainfall time series provided by the Environmental Protection Agency of Veneto Region (ARPAV). The rainfall depths were measured at the weather station located in the city of Mira.

The accuracy of the flow model calibration process was evaluated by matching simulated and observed hydraulic heads in reference boreholes. Specifically, the continuous logs of hydraulic heads collected at PZP36, PZP40 and PZP41 during the experimental campaigns presented in Dalla Libera *et al.* (2020) were used as calibration targets. These monitoring wells are located respectively located in the middle, northern and southern zones of WAA, therefore providing a reference head values in distinct parts of the aquifer.

The obtained results are shown in Figure S6. The implemented numerical model is able to reproduce the mean head levels in the three reference piezometers. An average efficiency index  $NSI$ , evaluated through the Nash-Sutcliffe method (Moriassi *et al.*, 2007) resulted in  $NSI = 0.33$ , i.e. a “reliable” calibration. In the middle part of WAA, the match between simulated and observed head levels at PZP36 is less accurate than at PZP40 and PZP41. This is explained considering that PZP36 is closer to the drainage system than the other piezometers. Using this mesh discretization, the simulated PZP36 head levels are more controlled by the DRN boundary than they are in real life. While a higher mesh refinement could have likely improved the head response in the PZP36 model cell, such a higher refinement may result in larger computational time. Since the main purpose of this model was to perform Monte-Carlo MRTM simulations to obtain a regional (i.e. model-wide) response of the aquifer, we considered the achieved level of calibration as sufficient good for the sake of this modelling analysis, and the adopted grid resolution as a proper trade-off between computational efficiency and ability of the model to reproduce the most salient hydrological features.

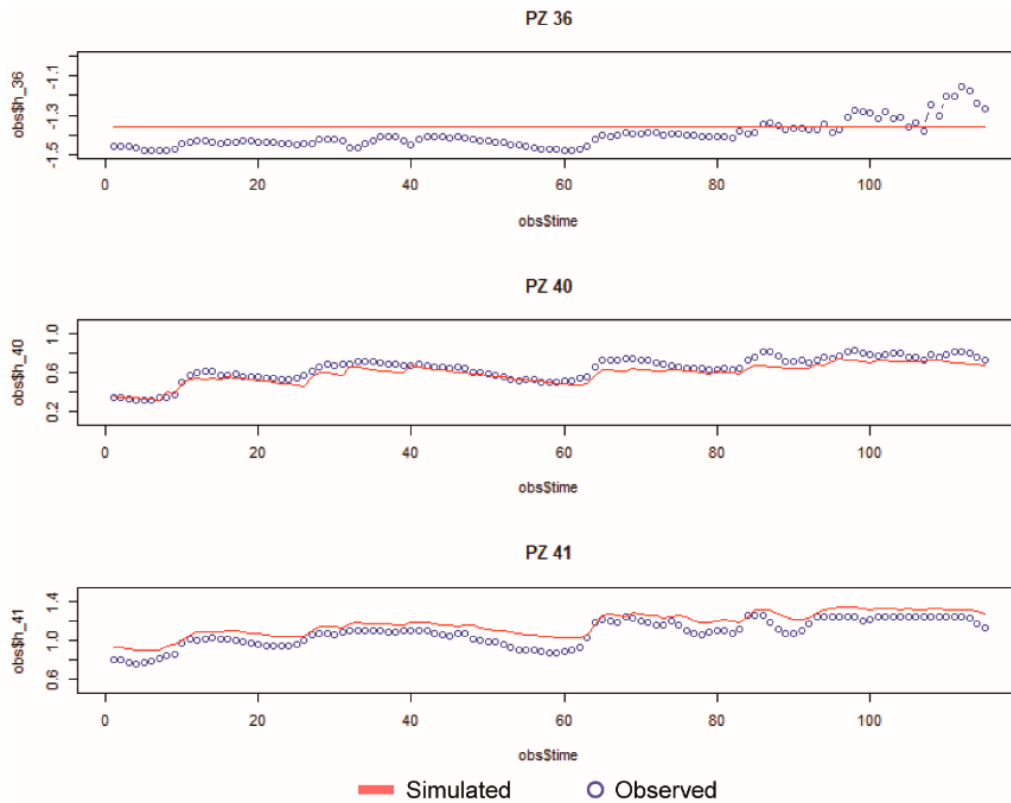

Figure S6 Comparison between the observed data collected through the weekly monitoring and the simulated data obtained by the 3D flow model. Both datasets are expressed using a daily lag time.

To further corroborate the quality of the calibration process, we visually compared the planar view of the resulting piezometric distribution in the aquifer at time 115 days (Figure S7 – left) and interpolated map of the head levels for the same period of time (right). Note that the two maps are similar, both in terms of variability in calculated head values and in the presence of the central depression caused by the drainage system.

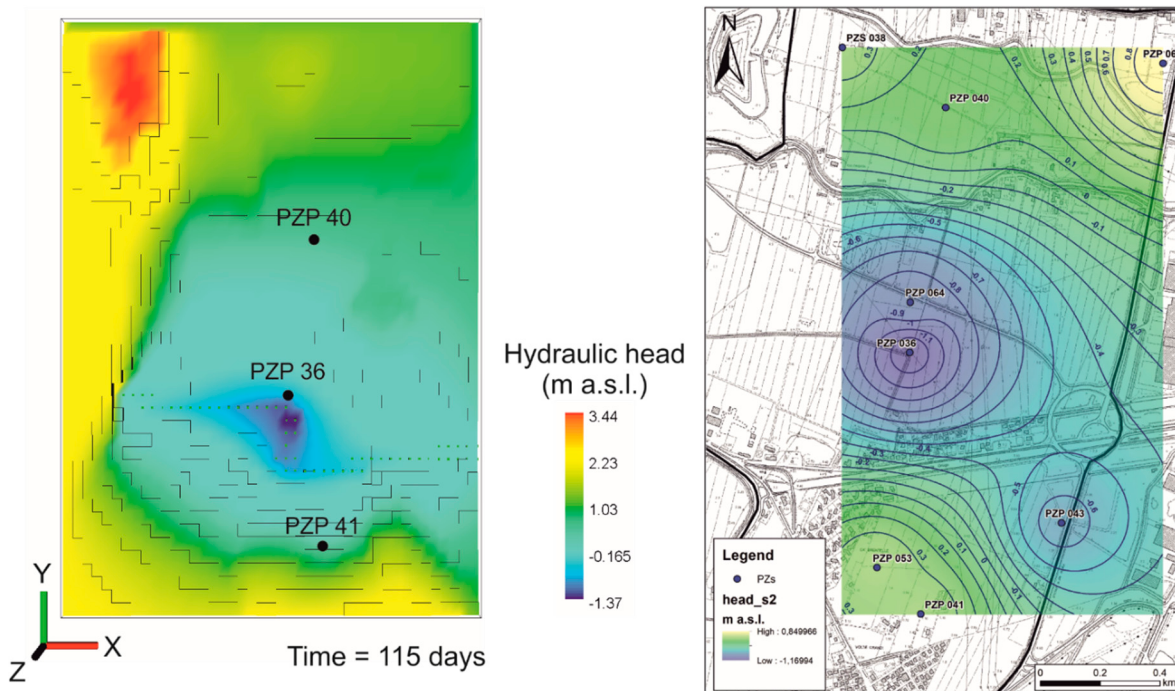

Figure S7 Comparison between the hydraulic head distribution simulated through the 3D flow model in PHAST and the hydraulic head map obtained from the interpolation of the data collected during the surveys.

## SI-4. Variograms computed on the 2009 dataset

The variograms were calculated using the code SGEMS v2.1 (<http://sgems.sourceforge.net/> , last accessed 8 August 2021) and reported below for As and Fe, respectively. We assumed an isotropic single-structure exponential model, with covariance (C) function of form

$$C(X) = C_0 + \sigma_X^2 \exp\left(-\frac{d}{a_X}\right)$$

where  $X$  is the variable,  $C_0$  is the nugget effect,  $\sigma_X^2$  is the sill (or variance),  $d$  is the lag distance and  $a_X$  is the range, which is related to characteristic correlation lengths. An average lag distance of 100m, with a tolerance of 100m, was considered.

- $X=\log(\text{As})$ ,  $C_0=0.05$ ,  $\sigma^2=0.4$ ,  $a=1000\text{m}$

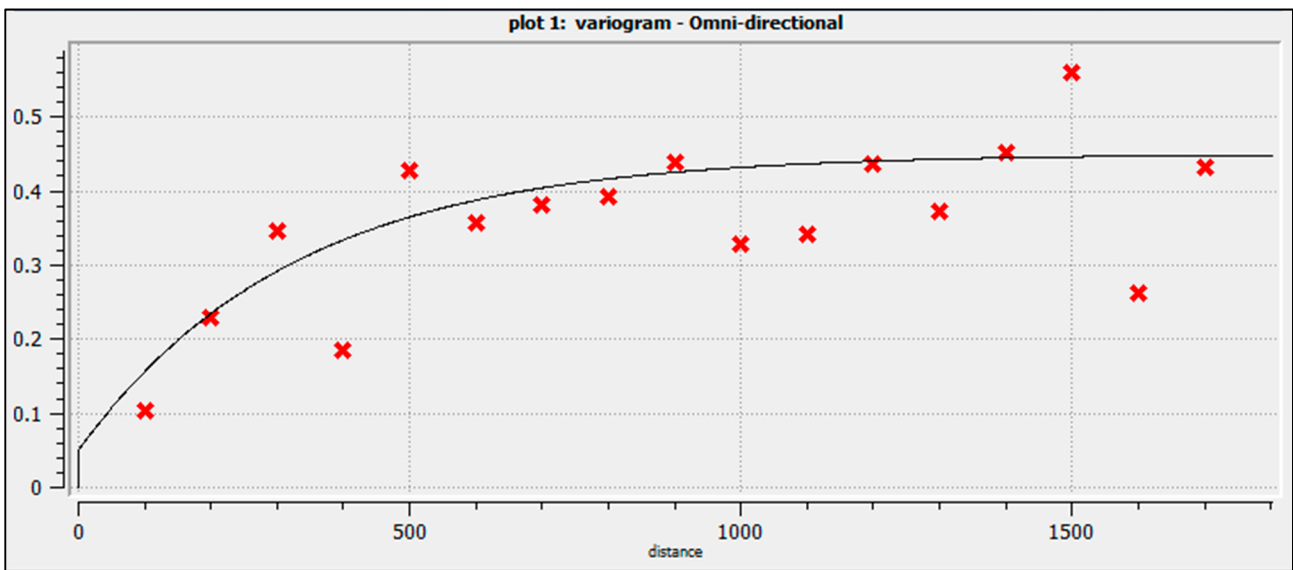

- $X=\log(\text{Fe})$ ,  $C_0=0.05$ ,  $\sigma^2=0.5$ ,  $a=600\text{m}$

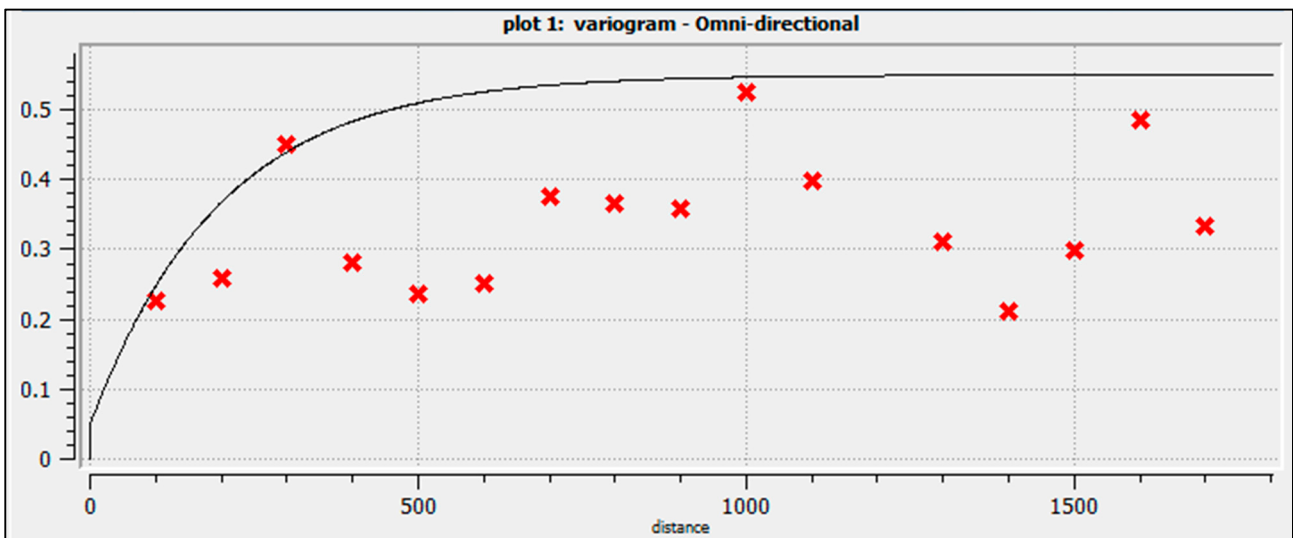

Examples of two SIS realizations reproducing As spatial variations in the modeled area are shown in Figure S8. The white line represents the WAA boundary. The realizations were obtained after backtransforming the data from log to linear scales. Note that the maximum concentration is  $174 \mu\text{gL}^{-1}$ , matching the maximum concentration measured in 2017 (see section SI-1). Similar maps are produced for Fe.

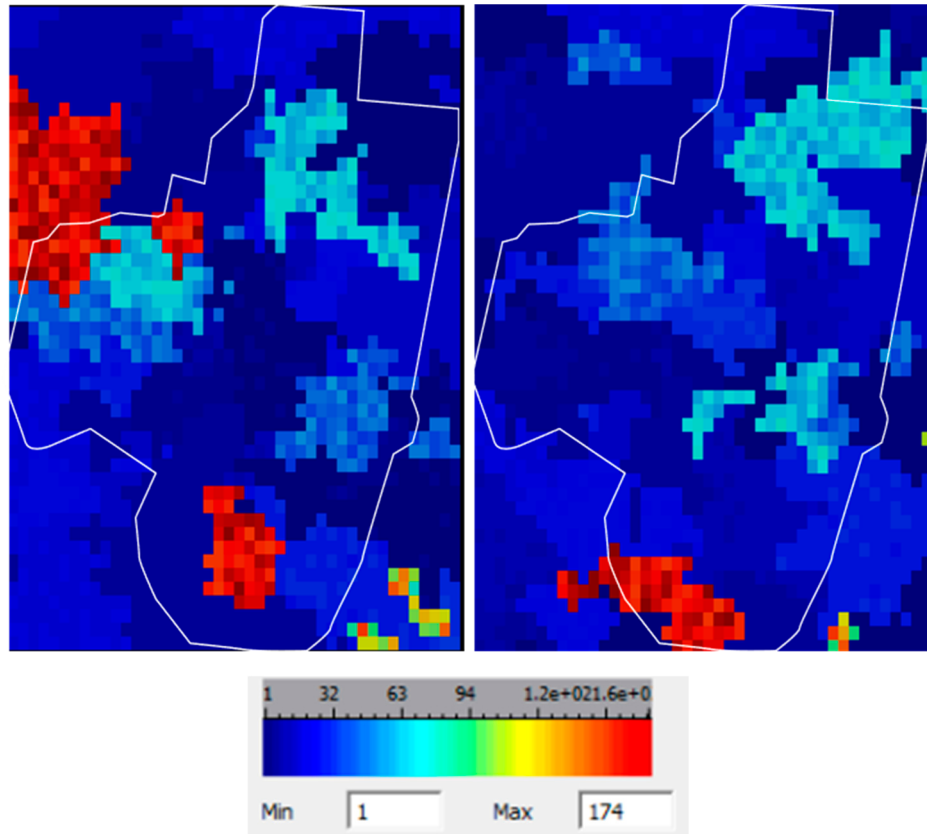

Figure S8 Two SIS realizations generated using SGEMS representing the variation of arsenic concentrations. The maps are created using the variograms presented above and calculated on the 2009 dataset, but conditioned to the 2017 measured concentrations in the eight monitored piezometers.

Bibliography:

Dalla Libera N, Pedretti D, Tateo F, Mason L, Piccinini L, Fabbri P. 2020. Conceptual model of arsenic mobility in the shallow alluvial aquifers near Venice (Italy) elucidated through machine learning and geochemical modeling. *Water Resources Research*, 56(9): e2019WR026234. <https://doi.org/10.1029/2019WR026234>.

Doherty J, Brebber L, Whyte P. 1994. PEST: Model-independent parameter estimation. *Watermark Computing, Corinda, Australia*, 122: 336.

Harbaugh AW. 2005. MODFLOW-2005 : the U.S. Geological Survey modular ground-water model-the ground-water flow process. *Techniques and Methods*.

Moriasi DN, Arnold JG, Van Liew MW, Bingner RL, Harmel RD, Veith TL. 2007. Model evaluation guidelines for systematic quantification of accuracy in watershed simulations. *Transactions of the ASABE*. American society of agricultural and biological engineers, 50(3): 885–900.
